# Supplementary material for: Molten BaCN2for the sintering and crystal growth of dielectric oxynitride perovskites Sr1−xBaxTaO2N (x= 0.04–0.23)
Source: Royal Society of Chemistry journal article supplement (doi:10.1039/c7dt03765a), 2017-01-01
Supplement: c7dt03765a1.pdf [file c7dt03765a1.pdf]

## Supporting Information to *Dalton Transactions*

### **Molten BaCN<sub>2</sub> for the sintering and crystal growth of dielectric oxynitride perovskite Sr<sub>1-x</sub>Ba<sub>x</sub>TaO<sub>2</sub>N ( $x = 0.04\text{--}0.23$ )**

Akira Hosono<sup>1,\*</sup>, Yuji Masubuchi<sup>2,\*</sup>, Takashi Endo<sup>1</sup>, Shinichi Kikkawa<sup>2</sup>

#### Affiliations:

<sup>1</sup>Graduate School of Chemical Science and Engineering, Hokkaido University, N13W8, Kita-ku, Sapporo 060-8628, Japan

<sup>2</sup>Faculty of Engineering, Hokkaido University, N13W8, Kita-ku, Sapporo 060-8628, Japan

#### \*Corresponding authors:

Akira Hosono; address: Graduate School of Chemical Science and Engineering, Hokkaido University, N13W8, Kita-ku, Sapporo 060-8628, Japan; Tel/Fax: +81-(0)11-706-6739/6740; E-mail: ezohakitaguni@frontier.hokudai.ac.jp

Associate professor Yuji Masubuchi; address: Faculty of Engineering, Hokkaido University, N13W8, Kita-ku, Sapporo 060-8628, Japan; Tel: +81-(0)11-706-6742; E-mail: yuji-mas@eng.hokudai.ac.jp

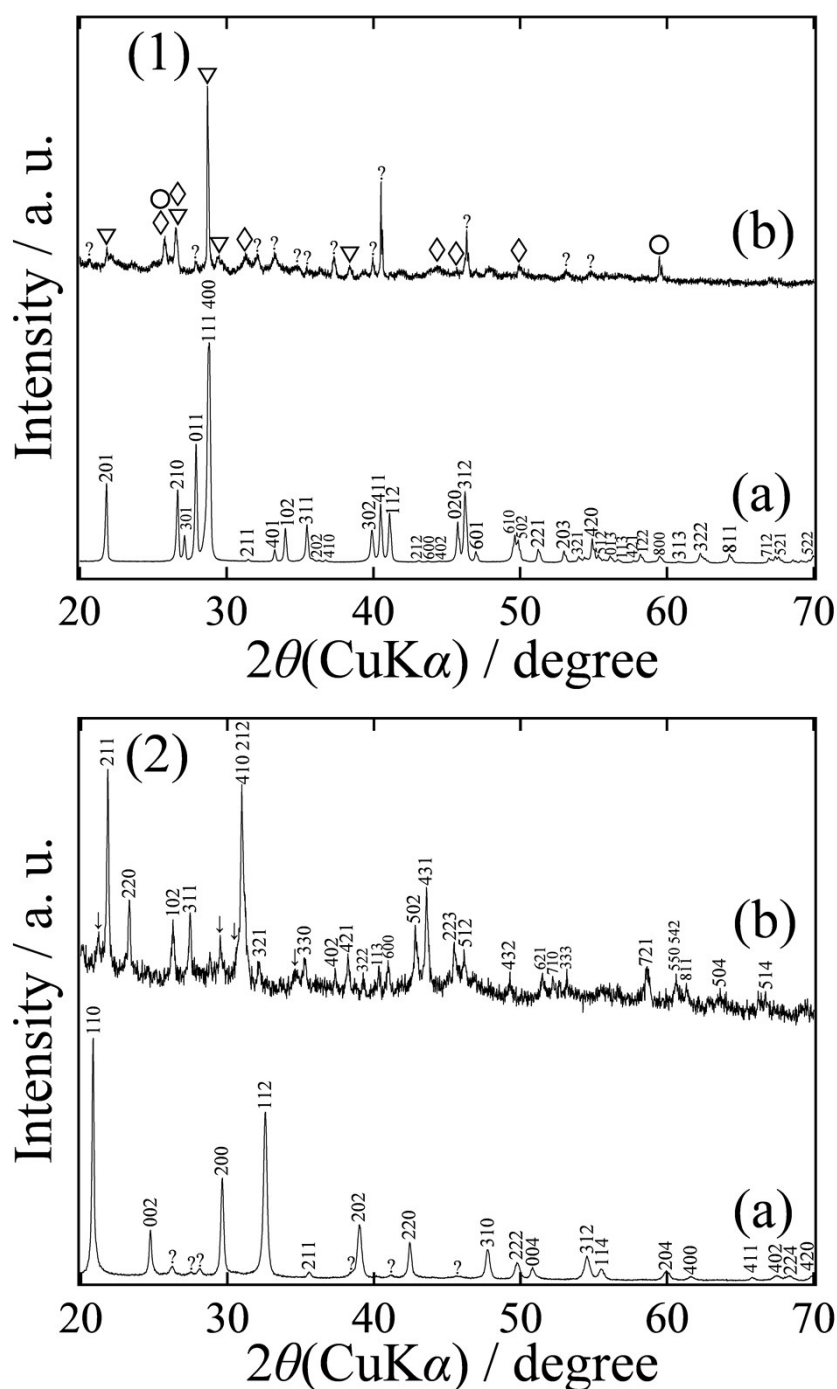

**Fig. S1** XRD patterns of (1) $\alpha$ -SrCN<sub>2</sub> and (2)BaCN<sub>2</sub> powders for (a)as-prepared and (b)the annealed samples.  $\alpha$ -SrCN<sub>2</sub> and BaCN<sub>2</sub> were annealed at approximately 1100 and 900 °C for 5 h. Indexed diffraction peaks shown in (1)(a), (2)(a), and (2)(b) are  $\alpha$ -SrCN<sub>2</sub> (JCPDS 51-541), tetragonal new phase of BaCN<sub>2</sub><sup>26</sup>, and rhombohedral BaCN<sub>2</sub> (JCPDS 51-542), respectively. Inverse triangles, diamonds, circles, arrows, and question marks indicate Sr(OH)<sub>2</sub> (ICSD 26029), graphite (ICSD 53781), SrC<sub>2</sub> (JCPDS 3-0542), Ba(OH)<sub>2</sub> (ICSD 56828), and unknown phases, respectively.
